# Supplementary material for: Monitoring the Evolution of the Aroma Profile of Lager Beer in Aluminium Cans and Glass Bottles during the Natural Ageing Process by Means of HS-SPME/GC-MS and Multivariate Analysis
Source: MDPI journal article supplement (doi:10.3390/molecules28062807), 2023-03-20
Supplement: s1 [file s1]

## Supplementary Material

1. Figure S1

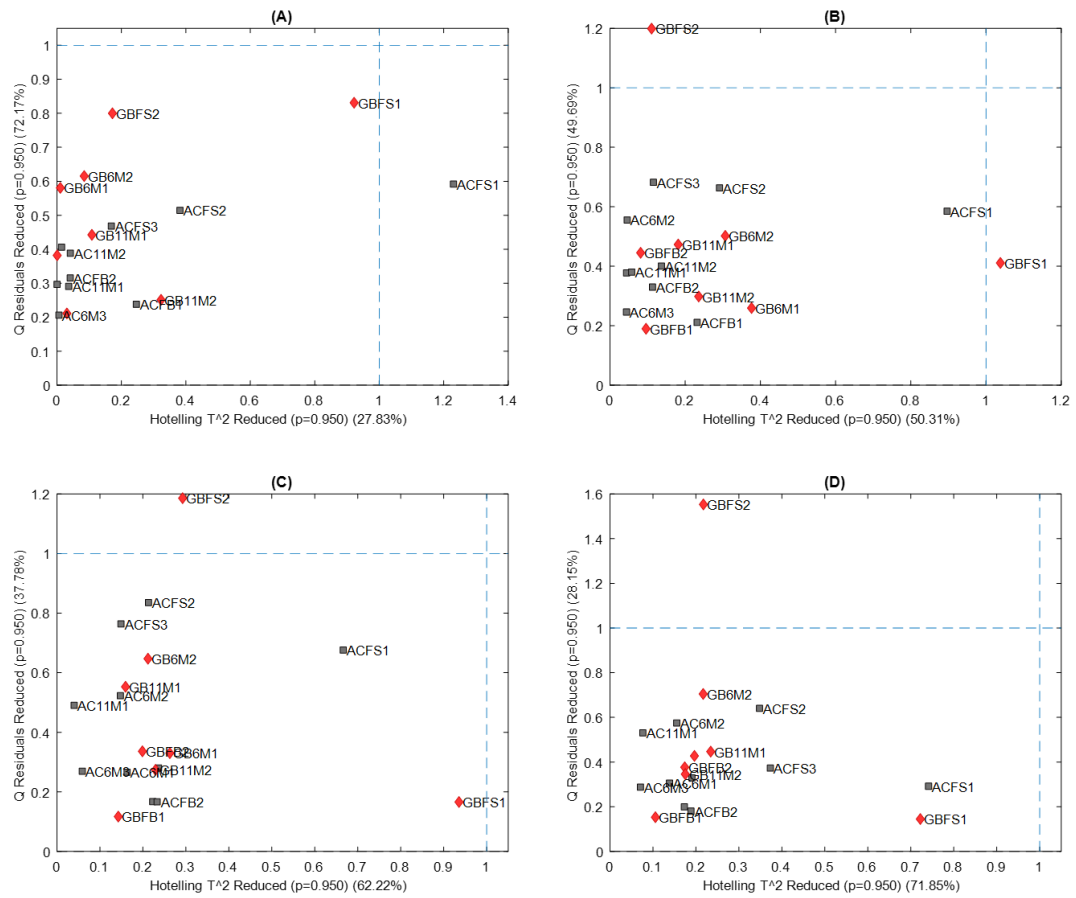

Figure S1: Hotelling T<sup>2</sup> vs Q residual plots for the PCA models with (A) one, (B) two, (C) three, and (D) four principal components.
